# Supplementary material
Source: MDPI journal article supplement (https://www.mdpi.com/2379-139X/7/3/36)
Supplement: s1 [file s1]

## Supplementary tables

### Supplement S1. Test the normality of data

| Factors                                          | <i>p</i> -value |
|--------------------------------------------------|-----------------|
| Age                                              | <0.001          |
| Left pulmonary artery distensibility             | <0.001          |
| Right pulmonary artery distensibility            | <0.001          |
| Left pulmonary artery regurgitation fraction     | <0.001          |
| Right pulmonary artery regurgitation fraction    | <0.001          |
| Right ventricular ejection fraction              | 0.415*          |
| Pulmonary insufficiency                          | <0.001          |
| Left pulmonary artery- length                    | 0.027           |
| Right pulmonary artery- length                   | <0.001          |
| Left pulmonary artery- angle                     | 0.579*          |
| Right pulmonary artery- angle                    | 0.158*          |
| Net pulmonary blood flow- left pulmonary artery  | <0.001          |
| Net pulmonary blood flow- right pulmonary artery | <0.001          |

\* Data is normal distribution

**Supplementary Table S1.** Correlation between branch pulmonary artery regurgitation fraction and branch pulmonary distensibility.

| Variables                                   |                        | Regurgitation fraction (%) | Grading branch pulmonary regurgitation fraction (%) |                    | Pulmonary distensibility (%)      | <i>p</i> -value |
|---------------------------------------------|------------------------|----------------------------|-----------------------------------------------------|--------------------|-----------------------------------|-----------------|
|                                             |                        | Total                      | Mild to moderate                                    | Severe             | Coefficients (95% CI)             |                 |
| <b>Overall</b><br>(n = 182)                 | Left pulmonary artery  | n = 182 (100 %)            | n = 75 (41.2 %)                                     | n = 107 (58.8 %)   | 0.73 <sup>a</sup> (0.37, 1.09)    | < 0.001         |
|                                             |                        | 43.1 (32.6 - 51.1)         | 29.7 (10.2 - 37.1)                                  | 50.1 (44.5 - 57.6) | 19.02 <sup>b</sup> (6.08, 31.95)  | 0.004           |
|                                             | Right pulmonary artery | n = 182 (100 %)            | n = 118 (64.8 %)                                    | n = 64 (35.2 %)    | 1.63 <sup>a</sup> (1.22, 2.03)    | < 0.001         |
|                                             |                        | 35.2 (24.7 - 44.7)         | 30.3 (13.1 - 34.9)                                  | 47.2 (43.9 - 53.2) | 40.33 <sup>b</sup> (23.47, 57.20) | < 0.001         |
| <b>Children</b><br>(<18 years)<br>(n = 104) | Left pulmonary artery  | n = 104 (57.1 %)           | n = 41 (39.4 %)                                     | n = 63 (60.6 %)    | 0.54 <sup>a</sup> (0.06, 1.04)    | 0.028           |
|                                             |                        | 43.1 (31.9 - 52.1)         | 28.6 (12.6 - 36.1)                                  | 49.4 (44.2 - 55.0) | 17.85 <sup>b</sup> (0.25, 35.45)  | 0.047           |
|                                             | Right pulmonary artery | n = 104 (57.1 %)           | n = 64 (61.5 %)                                     | n = 40 (38.5 %)    | 1.73 <sup>a</sup> (1.19, 2.29)    | < 0.001         |
|                                             |                        | 35.5 (24.4 - 45.7)         | 29.5 (11.4 - 34.3)                                  | 46.8 (44.7 - 51.0) | 42.30 <sup>b</sup> (20.85, 63.75) | < 0.001         |
| <b>Adults</b><br>(≥18 years)<br>(n = 78)    | Left pulmonary artery  | n = 78 (42.9 %)            | n = 34 (43.6 %)                                     | n = 44 (56.4 %)    | 0.94 <sup>a</sup> (0.39, 1.49)    | 0.001           |
|                                             |                        | 43.0 (34.6 - 51.4)         | 30.8 (9.6 - 38.6)                                   | 51.0 (45.3 - 58.9) | 19.69 <sup>b</sup> (-0.68, 40.07) | 0.058           |
|                                             | Right pulmonary artery | n = 78 (42.9 %)            | n = 54 (69.2 %)                                     | n = 24 (30.8 %)    | 1.47 <sup>a</sup> (0.87, 2.09)    | < 0.001         |
|                                             |                        | 35.2 (25.3 - 43.2)         | 31.0 (18.3 - 36.0)                                  | 48.0 (43.6 - 58.0) | 33.21 <sup>b</sup> (-4.39, 70.81) | 0.083           |

<sup>a</sup> Correlation between branch pulmonary artery regurgitation fraction and pulmonary distensibility by using linear regression analysis (n = 182). <sup>b</sup> Median difference of left pulmonary artery distensibility comparing between mild-to-moderate and severe branch pulmonary regurgitation fraction by using median regression analysis. Data presented as median and interquartile range (25<sup>th</sup> - 75<sup>th</sup> percentile) and categorical variables presented as n (%).

**Supplement Table S2.** Factors associated with right ventricular function.

|                                             | Factors (%)                           | Total                      | Grading right ventricular ejection fraction (RVEF, %) |                            |                            |                            | <i>p</i> -value       |
|---------------------------------------------|---------------------------------------|----------------------------|-------------------------------------------------------|----------------------------|----------------------------|----------------------------|-----------------------|
|                                             |                                       |                            | ≥ 55 %                                                | ≥ 45 % and < 55 %          | ≥ 35 % and < 45 %          | < 35 %                     |                       |
|                                             |                                       | n = 182<br>(100 %)         | n = 24<br>(13.2 %)                                    | n = 86<br>(47.2 %)         | n = 56<br>(30.8 %)         | n = 16<br>(8.8 %)          |                       |
| <b>Overall</b><br>(n = 182)                 | RVEF<br>(mean ± SD)                   | 46.6 ± 8.4                 | 59.1 ± 2.9                                            | 50.1 ± 3.1                 | 40.4 ± 2.9                 | 30.6 ± 3.6                 | < 0.001               |
|                                             | Pulm-insuff<br>median (IQR)           | 45.3<br>(35.5 - 52.2)      | 37.6<br>(10.9 - 48.0)                                 | 43.1<br>(31.7 - 50.6)      | 47.1<br>(39.6 - 56.4)      | 53.2<br>(46.6 - 67.6)      | 0.042                 |
|                                             | LPA<br>distensibility<br>median (IQR) | 92.9<br>(68.0 - 121.3)     | 88.2<br>(70.8 - 129.2)                                | 97.4<br>(71.3 - 123.6)     | 82.8<br>(64.6 - 108.6)     | 99.8<br>(83.4 - 125.6)     | 0.383                 |
|                                             | RPA<br>distensibility<br>median (IQR) | 105.5<br>(76.2 - 144.8)    | 88.4<br>(57.7 - 120.6)                                | 103.5<br>(76.4 - 144.9)    | 115.4<br>(76.3 - 144.2)    | 129.0<br>(95.4 - 157.4)    | 0.368                 |
|                                             | LPA-RF*<br>(mean ± SE)                | 40.8 ± 0.68                | 40.5 ± 2.14                                           | 41.6 ± 1.11                | 41.1 ± 1.39                | 35.9 ± 2.64                | 0.268                 |
|                                             | RPA-RF *<br>(mean ± SE)               | 33.5 ± 0.68                | 32.1 ± 1.71                                           | 32.9 ± 0.89                | 34.3 ± 1.11                | 35.9 ± 2.11                | 0.434                 |
| <b>Children</b><br>(<18 years)<br>(n = 104) | <b>Factors (%)</b>                    | <b>n = 104<br/>(100 %)</b> | <b>n = 13<br/>(12.5 %)</b>                            | <b>n = 53<br/>(51.0 %)</b> | <b>n = 27<br/>(26.0 %)</b> | <b>n = 11<br/>(10.5 %)</b> | <b><i>p</i>-value</b> |
|                                             | RVEF<br>(mean ± SD)                   | 46.2 ± 8.5                 | 58.2 ± 1.5                                            | 49.7 ± 3.0                 | 40.1 ± 2.9                 | 29.8 ± 3.9                 | < 0.001               |
|                                             | Pulm-insuff<br>median (IQR)           | 45.3<br>(34.3 - 52.1)      | 44.1<br>(11.2 - 48.0)                                 | 42.2<br>(31.4 - 48.4)      | 49.0<br>(41.9 - 57.4)      | 63.8<br>(46.6 - 69.5)      | 0.022                 |
|                                             | LPA<br>distensibility<br>median (IQR) | 99.5<br>(73.3 - 126.1)     | 93.7<br>(76.2 - 132.6)                                | 100.7<br>(73.2 - 125.8)    | 91.3<br>(65.8 - 116.8)     | 112.4<br>(87.1 - 126.4)    | 0.701                 |
|                                             | RPA<br>distensibility<br>median (IQR) | 106.1<br>(82.2 - 144.4)    | 100.2<br>(60.5 - 132.8)                               | 103.9<br>(79.9 - 143.9)    | 114.9<br>(93.3 - 143.5)    | 131.1<br>(97.3 - 163.1)    | 0.580                 |
|                                             | LPA-RF*<br>(mean ± SE)                | 40.6 ± 0.83                | 40.9 ± 2.73                                           | 41.2 ± 1.35                | 42.2 ± 1.91                | 33.6 ± 3.1                 | 0.108                 |
|                                             | RPA-RF *<br>(mean ± SE)               | 33.6 ± 0.83                | 32.2 ± 2.02                                           | 33.2 ± 1.00                | 34.9 ± 1.41                | 34.2 ± 2.29                | 0.703                 |
| <b>Adults</b><br>(≥18 years)<br>(n = 78)    | <b>Factors (%)</b>                    | <b>n = 78<br/>(100 %)</b>  | <b>n = 11<br/>(14.1 %)</b>                            | <b>n = 33<br/>(42.3 %)</b> | <b>n = 29<br/>(37.2 %)</b> | <b>n = 5<br/>(6.4 %)</b>   | <b><i>p</i>-value</b> |
|                                             | RVEF<br>(mean ± SD)                   | 47.1 ± 8.3                 | 60.1 ± 3.8                                            | 50.5 ± 3.3                 | 40.7 ± 2.8                 | 32.3 ± 2.3                 | < 0.001               |
|                                             | Pulm-insuff<br>median (IQR)           | 45.6<br>(35.7 - 52.2)      | 36.7<br>(6.9 - 47.8)                                  | 46.1<br>(36.1 - 54.0)      | 45.9<br>(37.6 - 52.9)      | 49.2<br>(44.7 - 52.2)      | 0.580                 |
|                                             | LPA<br>distensibility<br>median (IQR) | 88.3<br>(64.0 - 109.3)     | 87.8<br>(55.8 - 121.3)                                | 93.1<br>(71.3 - 113.3)     | 76.5<br>(56.7 - 97.0)      | 92.7<br>(64.9 - 97.9)      | 0.589                 |

|                                 |                         |                        |                         |                         |                         |       |
|---------------------------------|-------------------------|------------------------|-------------------------|-------------------------|-------------------------|-------|
| RPA distensibility median (IQR) | 101.4<br>(69.3 - 144.8) | 82.5<br>(56.8 - 116.8) | 103.1<br>(70.5 - 146.7) | 115.9<br>(69.7 - 144.8) | 126.8<br>(93.6 - 151.8) | 0.619 |
| LPA-RF*<br>(mean $\pm$ SE)      | 41.0 $\pm$ 1.1          | 40.1 $\pm$ 3.47        | 42.3 $\pm$ 1.94         | 40.0 $\pm$ 2.08         | 41.0 $\pm$ 5.01         | 0.871 |
| RPA-RF *<br>(mean $\pm$ SE)     | 33.3 $\pm$ 1.1          | 32.0 $\pm$ 2.97        | 32.7 $\pm$ 1.66         | 33.5 $\pm$ 1.78         | 38.6 $\pm$ 4.29         | 0.607 |

\* Data derived from linear regression analysis adjusted pulmonary insufficiency. Data presented as mean  $\pm$  SD or median and interquartile range, IQR (25<sup>th</sup> - 75<sup>th</sup> percentile), and categorical variables presented as n (%) as appropriate. LPA = left pulmonary artery, LPA-RF = left pulmonary artery regurgitation fraction, RPA = right pulmonary artery, RPA-RF = right pulmonary artery regurgitation fraction, Pulm-insuff = pulmonary insufficiency, SE = standard error.
